# Supplementary material for: Genetic diversity increases with depth in red gorgonian populations of the Mediterranean Sea and the Atlantic Ocean
Source: PeerJ. 2019 May 24;7:e6794. doi: 10.7717/peerj.6794 (PMC6536111; doi:10.7717/peerj.6794)
Supplement: Table S1 [file peerj-07-6794-s001.xlsx]

## Sheet: Sheet1
Genetic diversity increases with depth in red gorgonian populations of the Mediterranean Sea and the Atlantic Ocean
Joanna Pilczynska, Silvia Cocito, Joana R. H. Boavida, Ester A. Serrão, Jorge M. Assis, Eliza Fragkopoulou, Henrique Queiroga
S1. Sampling sites of the red gorgonian (Paramuricea clavata) populations in the Atlantic Ocean and the Mediterranean Sea.
Table 1. Site name, region, code, year of sampling, coordinates (decimal), depth (meters), number of sampled individuals (n) and genetic diversity (mean, SD, p-value) as standardized allelic richness (A), private alleles (PÂ), expected heterozygosity (He) and significant values for genetic bottlenecks (heterozygosity excess) inferred with the Wilcoxon Test (models TPM).
Site	Region	Code	Year	Lon	Lat	Depth	n	A	A (SD)	A (p-value)	PA	PA (SD)	PA (p-value)	He	He (SD)	He (p-value)	Wilcoxon Test TPM	Source
Berlengas (shallow)	Atlantic	BerS	2011	-9.50011	39.41606	12	28	4.6	0	NS	3.17	0.38	NS	0.62	0	NS	0.015625	This study
Berlengas (deeper)	Atlantic	BerD	2011	-9.49807	39.42424	21.5	30	6.11	0.15	1.16E-40	10.71	0.5	9.15E-39	0.68	0.01	NS	NS	This study
Espichel (shallow)	Atlantic	EspS	2011	-9.22563	38.40704	38.5	72	8.93	0.63	NS	16.68	2.52	NS	0.67	0.02	NS	NS	This study
Espichel (deeper)	Atlantic	EspD	2011	-9.23214	38.40301	55	32	10	0	1.64E-33	22.02	1.51	4.25E-30	0.78	0	NS	NS	This study
Sagres (shallow)	Atlantic	SagS	2011	-8.96775	37.01704	12	18	2.53	0.37	NS	12.67	1.87	NS	0.55	0.08	NS	NS	This study
Sagres (deeper)	Atlantic	SagD	2011	-9.02726	37.00864	60	10	4.6	0	4.8E-39	23	0	4.8E-39	0.53	0	NS	NS	This study
Punta Mesco (shallow)	Mediterranean	PMeS	2013	9.5994	44.15331	22	30	5.4	0	NS	3	0	NS	0.68	0	NS	0.046875	This study
Punta Mesco (deeper)	Mediterranean	PMeD	2013	9.61588	44.13715	28	30	7.2	0	4.81E-45	12	0	4.81E-45	0.71	0	NS	NS	This study
Livorno (shallow)	Mediterranean	LivS	2013	10.30156	43.49618	25	25	7	0	NS	9.63	0.69	NS	0.7	0	NS	NS	This study
Livorno (deeper)	Mediterranean	LivD	2013	10.27695	43.50893	30	30	7.09	0.21	0.00000632	10.06	0.83	0.000019	0.69	0.01	NS	NS	This study
Pota Del Llop (Medes Islands, Spain) (shallow)	Mediterranean	LlopS	2011	3.228889	42.049722	15	27	9.6	0	NS	8	0	NS	0.76	0	NS	NS	Mokhtar-Jamaï et al. (2011)
Pota Del Llop (Medes Islands, Spain) (deeper)	Mediterranean	LlopD	2011	3.228889	42.049722	35	27	10.8	0	4.81E-45	14	0	4.81E-45	0.7	0	NS	NS	Mokhtar-Jamaï et al. (2011)
Pharillons (Marseille, France) (shallow)	Mediterranean	PhaS	2011	5.338333	43.2075	20	27	8	0	NS	5.2	0.51	NS	0.69	0	NS	NS	Mokhtar-Jamaï et al. (2011)
Pharillons (Marseille, France) (deeper)	Mediterranean	PhaD	2011	5.338333	43.2075	40	28	10.7	0.17	1.1E-40	18.72	0.57	3.3E-39	0.77	0	NS	NS	Mokhtar-Jamaï et al. (2011)
Grotte Peres (Marseille, France) (shallow)	Mediterranean	GrotS	2011	5.391111	43.186667	10	29	9	0	NS	8.53	0.69	NS	0.67	0	NS	NS	Mokhtar-Jamaï et al. (2011)
Grotte Peres (Marseille, France) (deeper)	Mediterranean	GrotD	2011	5.391111	43.186667	20	38	10.69	0.36	4.54E-39	16.96	1.62	2.14E-35	0.73	0.01	NS	NS	Mokhtar-Jamaï et al. (2011)
Petit Congloue (Marseille, France) (shallow)	Mediterranean	PetS	2011	5.395556	43.171167	10	33	10.39	0.23	1.53E-37	13.86	0.9	3.06E-33	0.77	0.01	NS	NS	Mokhtar-Jamaï et al. (2011)
Petit Congloue (Marseille, France) (deeper)	Mediterranean	PetD	2011	5.395556	43.171167	20	27	9.8	0	NS	10.89	0.86	NS	0.72	0	NS	NS	Mokhtar-Jamaï et al. (2011)
Riou Sud (Marseille, France) (shallow)	Mediterranean	RiouS	2011	5.390278	43.172778	20	31	10.67	0.2	NS	13.1	0.8	NS	0.73	0.01	NS	NS	Mokhtar-Jamaï et al. (2011)
Riou Sud (Marseille, France) (deeper)	Mediterranean	RiouD	2011	5.390278	43.172778	40	26	10.9	0	NS	13.57	1.03	NS	0.72	0	NS	NS	Mokhtar-Jamaï et al. (2011)
